# Supplementary material
Source: PubMed Central journal article supplement (PMC5362329)
Supplement: NIHMS840698-supplement.pdf [file NIHMS840698-supplement.pdf]

**Appendix Table 1.** Electronic Health Records Attitudes Survey: Questions Regarding Family History or Genetic Information in the Electronic Health Record

| Survey question                                                                                                                                                                        | Strongly agree                        | Agree                                 | Neutral                               | Disagree                              | Strongly disagree                     |
|----------------------------------------------------------------------------------------------------------------------------------------------------------------------------------------|---------------------------------------|---------------------------------------|---------------------------------------|---------------------------------------|---------------------------------------|
| 1. Details of my family history of medical conditions should be included in my electronic health record.                                                                               | <input type="checkbox"/> <sub>1</sub> | <input type="checkbox"/> <sub>2</sub> | <input type="checkbox"/> <sub>3</sub> | <input type="checkbox"/> <sub>4</sub> | <input type="checkbox"/> <sub>5</sub> |
| 2. My genetic information should be included in my electronic health record.                                                                                                           | <input type="checkbox"/> <sub>1</sub> | <input type="checkbox"/> <sub>2</sub> | <input type="checkbox"/> <sub>3</sub> | <input type="checkbox"/> <sub>4</sub> | <input type="checkbox"/> <sub>5</sub> |
| 3. I believe that incorporating my genetic information into the electronic health record will enable tailored medical therapy that takes into consideration my unique genetic make-up. | <input type="checkbox"/> <sub>1</sub> | <input type="checkbox"/> <sub>2</sub> | <input type="checkbox"/> <sub>3</sub> | <input type="checkbox"/> <sub>4</sub> | <input type="checkbox"/> <sub>5</sub> |
| 4. If you were tested for genetic risk of a medical condition, would you agree to automated notifications of test results to:                                                          |                                       |                                       |                                       |                                       |                                       |
| a. Your siblings                                                                                                                                                                       | <input type="checkbox"/> <sub>1</sub> | <input type="checkbox"/> <sub>2</sub> | <input type="checkbox"/> <sub>3</sub> | <input type="checkbox"/> <sub>4</sub> | <input type="checkbox"/> <sub>5</sub> |
| b. Your parents                                                                                                                                                                        | <input type="checkbox"/> <sub>1</sub> | <input type="checkbox"/> <sub>2</sub> | <input type="checkbox"/> <sub>3</sub> | <input type="checkbox"/> <sub>4</sub> | <input type="checkbox"/> <sub>5</sub> |
| c. Your children                                                                                                                                                                       | <input type="checkbox"/> <sub>1</sub> | <input type="checkbox"/> <sub>2</sub> | <input type="checkbox"/> <sub>3</sub> | <input type="checkbox"/> <sub>4</sub> | <input type="checkbox"/> <sub>5</sub> |
| d. Other relatives                                                                                                                                                                     | <input type="checkbox"/> <sub>1</sub> | <input type="checkbox"/> <sub>2</sub> | <input type="checkbox"/> <sub>3</sub> | <input type="checkbox"/> <sub>4</sub> | <input type="checkbox"/> <sub>5</sub> |
| 5. If you underwent a genetic test, would you grant medical insurance companies access to your genetic test results?                                                                   | <input type="checkbox"/> <sub>1</sub> | <input type="checkbox"/> <sub>2</sub> | <input type="checkbox"/> <sub>3</sub> | <input type="checkbox"/> <sub>4</sub> | <input type="checkbox"/> <sub>5</sub> |

*Notes:* The first half of the survey contained 5 statements. Participants were asked to indicate the importance of each statement. Statements 1-5 addressing attitudes towards incorporation and use of family history and genetic risk information were assessed after risk disclosure; statements 1, 4, and 5 are adapted from the HINTS 2013 survey, and statements 2 and 3 are novel to help determine participants' views regarding inclusion and use of personal genetics in their EHR.

**Appendix**  
**Disclosing Genetic Risk for Coronary Heart Disease: Attitudes Toward Personal Information in Health Records**  
**Brown et al.**

**Appendix Table 2.** Electronic Health Records Attitudes Survey: Questions Regarding Other Medical Information in the Electronic Health Record

|                                                                                                                                                                                                                                                                 | <b>Very important</b>                 | <b>Somewhat important</b>             | <b>Not at all important</b>           | <b>Don't know</b>                     |
|-----------------------------------------------------------------------------------------------------------------------------------------------------------------------------------------------------------------------------------------------------------------|---------------------------------------|---------------------------------------|---------------------------------------|---------------------------------------|
| 6. Doctors and other healthcare providers should be able to share your medical information with each other electronically.                                                                                                                                      | <input type="checkbox"/> <sub>1</sub> | <input type="checkbox"/> <sub>2</sub> | <input type="checkbox"/> <sub>3</sub> | <input type="checkbox"/> <sub>4</sub> |
|                                                                                                                                                                                                                                                                 | <b>Very confident</b>                 | <b>Somewhat confident</b>             | <b>Not at all confident</b>           |                                       |
| 7. How confident are you that safeguards (including the use of technology) are in place to protect your medical records from being seen by people who aren't permitted to see them?                                                                             | <input type="checkbox"/> <sub>1</sub> | <input type="checkbox"/> <sub>2</sub> | <input type="checkbox"/> <sub>3</sub> |                                       |
|                                                                                                                                                                                                                                                                 | <b>Yes</b>                            | <b>No</b>                             |                                       |                                       |
| 8. Have you ever kept information from your healthcare provider because you were concerned about the privacy or security of your medical record?                                                                                                                | <input type="checkbox"/> <sub>1</sub> | <input type="checkbox"/> <sub>2</sub> |                                       |                                       |
|                                                                                                                                                                                                                                                                 | <b>Very concerned</b>                 | <b>Somewhat concerned</b>             | <b>Not Concerned</b>                  |                                       |
| 9. If your medical information is sent electronically from one healthcare provider to another, how concerned are you that an unauthorized person would see it? (Electronically means from computer to computer, instead of by telephone, mail, or fax machine). | <input type="checkbox"/> <sub>1</sub> | <input type="checkbox"/> <sub>2</sub> | <input type="checkbox"/> <sub>3</sub> |                                       |
|                                                                                                                                                                                                                                                                 | <b>Strongly agree</b>                 | <b>Somewhat agree</b>                 | <b>Somewhat disagree</b>              | <b>Strongly disagree</b>              |
| 10. In general, I think that the information I give doctors is safely guarded.                                                                                                                                                                                  | <input type="checkbox"/> <sub>1</sub> | <input type="checkbox"/> <sub>2</sub> | <input type="checkbox"/> <sub>3</sub> | <input type="checkbox"/> <sub>4</sub> |
|                                                                                                                                                                                                                                                                 | <b>Very confident</b>                 | <b>Somewhat confident</b>             | <b>Not confident</b>                  |                                       |
| 11. How confident are you that you have some say in who is allowed to collect, use and share your medical information? Having a say in who can collect, use and share your medical information has to do with the privacy of your records.                      | <input type="checkbox"/> <sub>1</sub> | <input type="checkbox"/> <sub>2</sub> | <input type="checkbox"/> <sub>3</sub> |                                       |
|                                                                                                                                                                                                                                                                 | <b>Very concerned</b>                 | <b>Somewhat concerned</b>             | <b>Not Concerned</b>                  |                                       |

**Appendix**  
**Disclosing Genetic Risk for Coronary Heart Disease: Attitudes Toward Personal Information in Health Records**  
**Brown et al.**

|                                                                                                                                                         |                                       |                                       |                                       |                                       |
|---------------------------------------------------------------------------------------------------------------------------------------------------------|---------------------------------------|---------------------------------------|---------------------------------------|---------------------------------------|
| 12. If your medical information is sent by fax from one healthcare provider to another, how concerned are you that an unauthorized person would see it? | <input type="checkbox"/> <sub>1</sub> | <input type="checkbox"/> <sub>2</sub> | <input type="checkbox"/> <sub>3</sub> |                                       |
|                                                                                                                                                         | <b>Strongly agree</b>                 | <b>Somewhat agree</b>                 | <b>Somewhat disagree</b>              | <b>Strongly disagree</b>              |
| 13. Scientists doing research should be able to review my medical information if the information cannot be linked to me personally.                     | <input type="checkbox"/> <sub>1</sub> | <input type="checkbox"/> <sub>2</sub> | <input type="checkbox"/> <sub>3</sub> | <input type="checkbox"/> <sub>4</sub> |
|                                                                                                                                                         | <b>Very important</b>                 | <b>Somewhat important</b>             | <b>Not at all important</b>           | <b>Don't know</b>                     |
| 14. How important would it be for you to get your own medical information electronically?                                                               | <input type="checkbox"/> <sub>1</sub> | <input type="checkbox"/> <sub>2</sub> | <input type="checkbox"/> <sub>3</sub> | <input type="checkbox"/> <sub>4</sub> |

The second half of the survey contained 9 statements. Participants were asked to indicate the importance of each statement. Statements 6-14 addressing attitudes towards incorporation and use of other medical personal health information in the EHR were assessed at baseline and after risk disclosure; statements 6-9, 11-12, and 14 are taken from the HINTS 2011 survey; statements 10 and 13 are from the HINTS 2007 survey.
